# Supplementary material for: Dopant-configuration controlled carrier scattering in graphene
Source: Royal Society of Chemistry journal article supplement (doi:10.1039/c5ra05338b), 2015-01-01
Supplement: c5ra05338b1.pdf [file c5ra05338b1.pdf]

**Supporting information for**  
**“Dopant-configuration controlled carrier scattering in**  
**graphene”**

*Benoy Anand,*<sup>a</sup> *Mehmet Karakaya,*<sup>b</sup> *Gyan Prakash,*<sup>c</sup> *S. Siva Sankara Sai,*<sup>a</sup> *Reji Philip,*<sup>d</sup>  
*Paola Ayala,*<sup>e</sup> *Anurag Srivastava,*<sup>f</sup> *Ajay K. Sood,*<sup>c</sup> *and Apparao M. Rao*<sup>b</sup>, *Ramakrishna*  
*Podila,*<sup>\*b, g</sup>

<sup>a</sup> Department of Physics, Sri Sathya Sai Institute of Higher Learning,

Puttaparthi, Andhra Pradesh, 515134, India

<sup>b</sup> Department of Physics and Astronomy, and Clemson Nanomaterials Center,

Clemson University, Clemson, SC, 29634, USA

<sup>c</sup> Department of Physics and Center for Ultrafast Laser Applications, Indian Institute of  
Science, Bangalore, Karnataka, 560012, India

<sup>d</sup> Light and Matter Physics Group, Raman Research Institute,

Bangalore, Karnataka, 560080, India

<sup>e</sup> Faculty of Physics, University of Vienna,

Strudlhofgasse 4, A-1090 Vienna, Austria

<sup>f</sup> Advanced Materials Research Group and Computational Nanoscience & Technology  
Lab, ABV-Indian Institute of Information Technology, Gwalior, Madhya Pradesh,  
474010, India

<sup>g</sup> Laboratory of Nano-biophysics, and COMSET, Clemson University, Clemson, SC  
29634, USA

E-mail: rpodila@clemson.edu

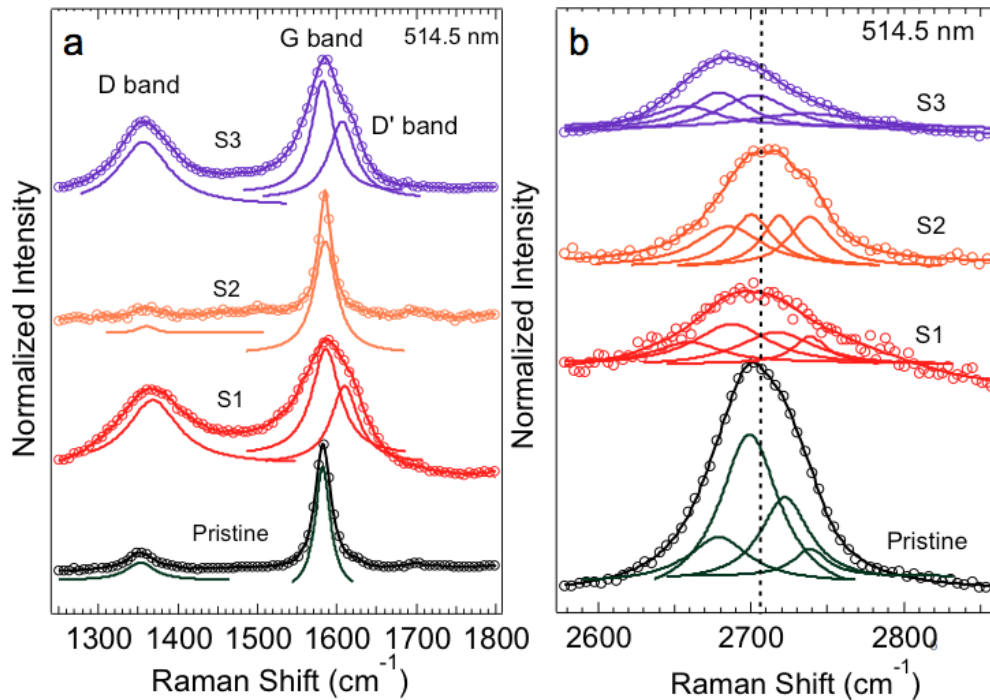

**Figure S1.** Raman spectra for pristine and N doped graphene (S1 – S3) obtained using 514.5 nm excitation. The *D* and *D'* bands in panel a) are intense for S1 and S3, and are attributed to N dopants present in the non-graphitic doping configuration (see text). Notably, the *D* and *G* band intensities for S2 (graphitic doping configuration) are similar to those exhibited by pristine graphene, except for the defect-induced broadening. The electron-phonon energy renormalization upon doping results in a net downshift of the peak position of the *G'* band for S1 and S3 relative to that for pristine and S2.

**Figure S2:** Density functional theory calculations showing the electron density of porphyrin-type defects. The formation energy was found to be 9.75 eV with a bandgap of 0.1 eV at the K-point indicating it is energetically favorable. Nonetheless, our detailed X-ray photoemission spectroscopy studies (Ref. 9) did not show any evidence for porphyrin-like dopants in our samples. Accordingly, only graphitic, pyridinic, and pyrrolic dopants were considered based on micro-Raman and XPS studies discussed in Ref. 9.

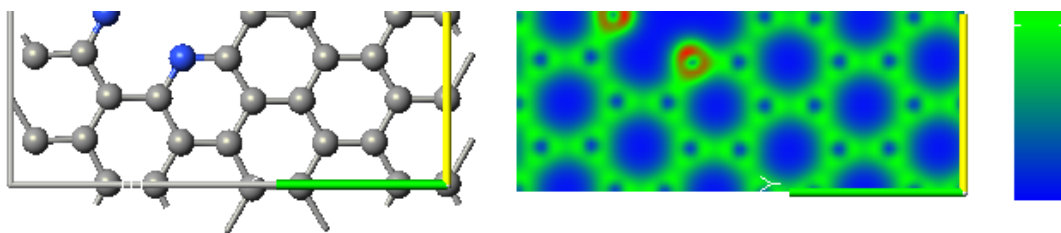

4.5 eV

0 eV
